# Supplementary material for: Atomistic understandings of reduced graphene oxide as an ultrathin-film nanoporous membrane for separations
Source: PubMed Central journal article supplement (PMC4667428; doi:10.1038/ncomms9335), 2015-09-23
Supplement: ncomms9335-s1.pdf [file ncomms9335-s1.pdf]

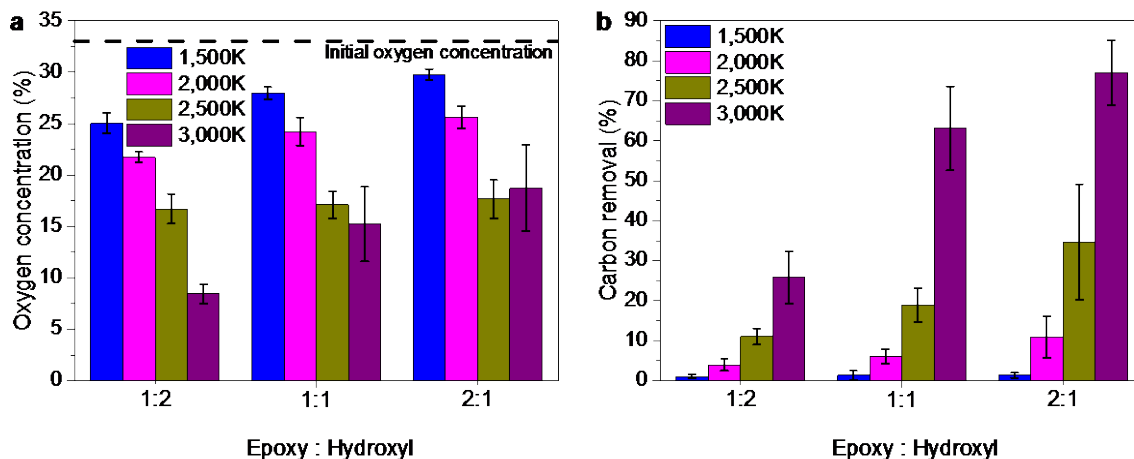

**Supplementary Figure 1 Extent of reduction and carbon removal.** The (a) statistically averaged oxygen concentration of resulting rGO structures and the (b) corresponding percentage of carbon removal were calculated over ten different samples for each combination of synthesis parameters. The figure shows the result of initial GO materials with an oxygen concentration of 33% that is highlighted using a dashed black line in (a).

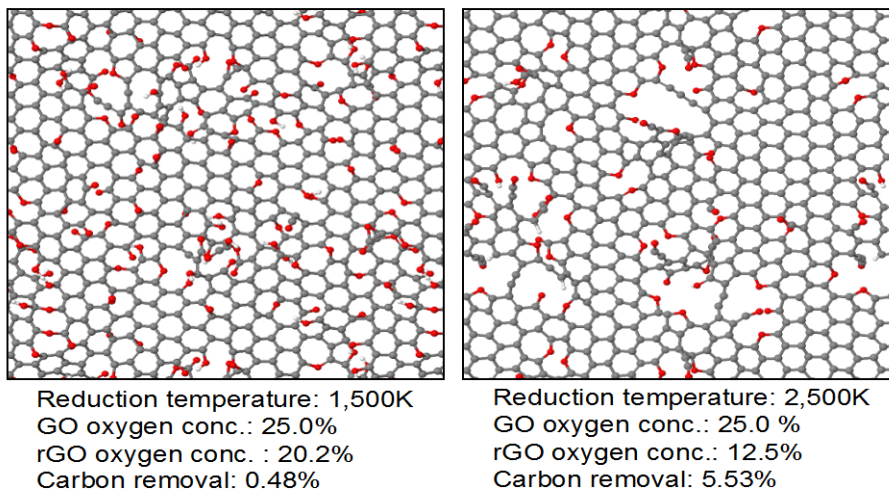

**Supplementary Figure 2 The effect of reduction temperatures on the pore formation of rGO.** The annealing temperatures used for the left and right structures were set to be 1500K and 2500K, respectively. With a higher temperature, the extent of reduction is increased and, most importantly, the carbon removal percentage is enhanced. As a result, a larger defect is observed in the right structure. In these simulations, the initial oxygen concentration and epoxy: hydroxyl ratio of GO materials were chosen to be 25% and 1:1, respectively. These structures are represented as stick and ball with carbon, oxygen, and hydrogen atoms in grey, red, and white color, respectively.

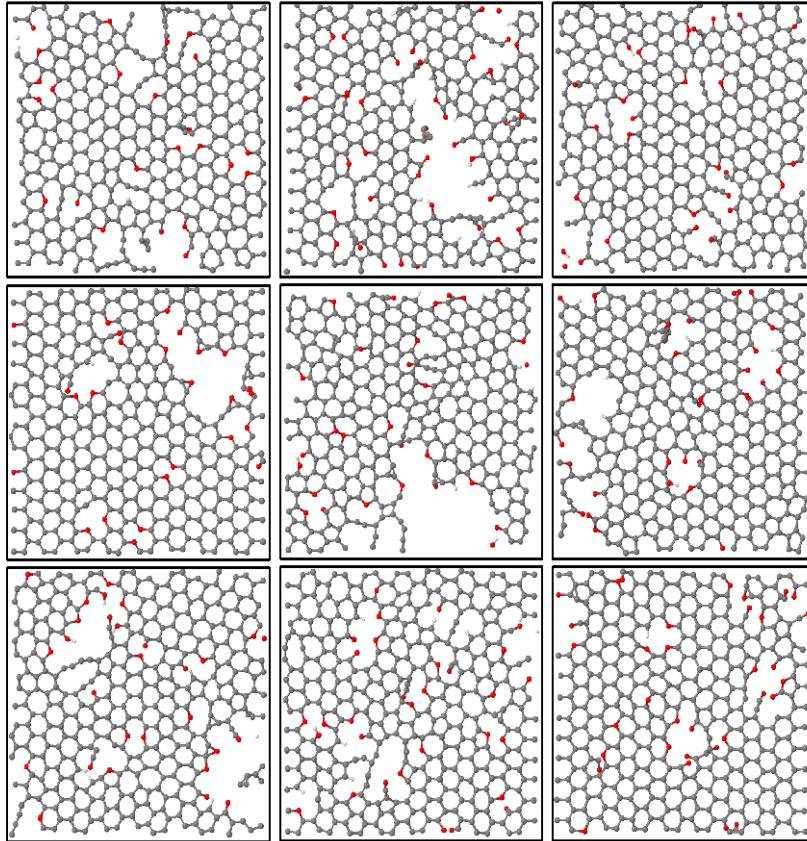

**Supplementary Figure 3 Non uniform pore sizes of rGO membranes.** Different structural features (i.e., pore sizes) were obtained at a total oxygen concentration of 25%, epoxy: hydroxyl ratio of 1:1, and temperature of 3000K. These structures are represented as stick and ball with carbon, oxygen, and hydrogen atoms in grey, red, and white color, respectively. A unit cell at a dimension of about 3.4 nm by 3.2 nm of each structure is shown in this figure.

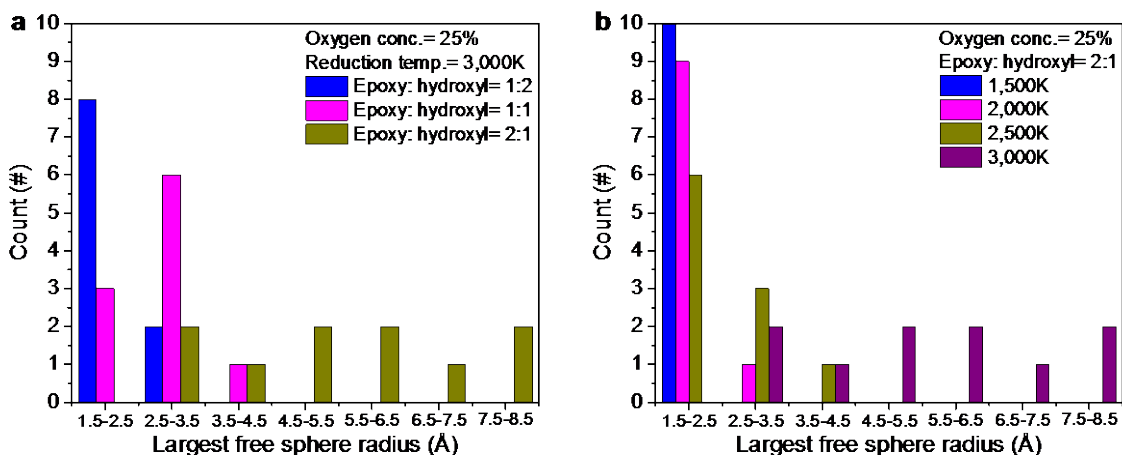

**Supplementary Figure 4 rGO pore size distribution.** The effects of (a) epoxy:hydroxyl ratios and (b) reduction temperatures on the rGO largest free sphere radius distribution are shown in this figure. The largest free sphere radius of each rGO membrane was computed based upon the membrane's projected coordinates on the X-Y plane, representing an effectively minimum radius of the largest pore of an rGO membrane. The regions within the van der Waals surface of each atom were not excluded.

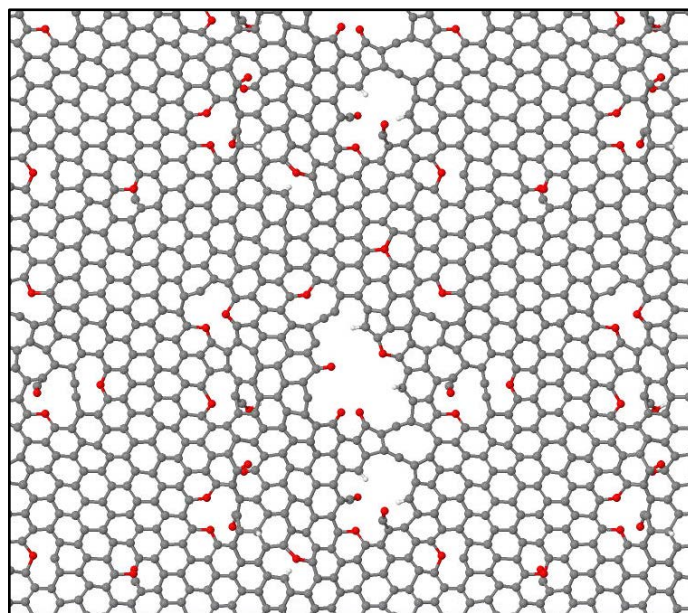

**Supplementary Figure 5 Atomic structure of the rGO membrane used in this work for CO<sub>2</sub>/CH<sub>4</sub> separation.** The illustrated structure is one of the resulting rGO materials obtained from the synthesis parameters using an initial oxygen concentration of 25%, epoxy: hydroxyl ratio of 1:2, and reduction temperature of 3000K (i.e., denoted as S5 that is listed in Supplementary Table 2 under the aforementioned condition). The structure is represented as stick and ball with carbon, oxygen, and hydrogen atoms in grey, red, and white color, respectively.

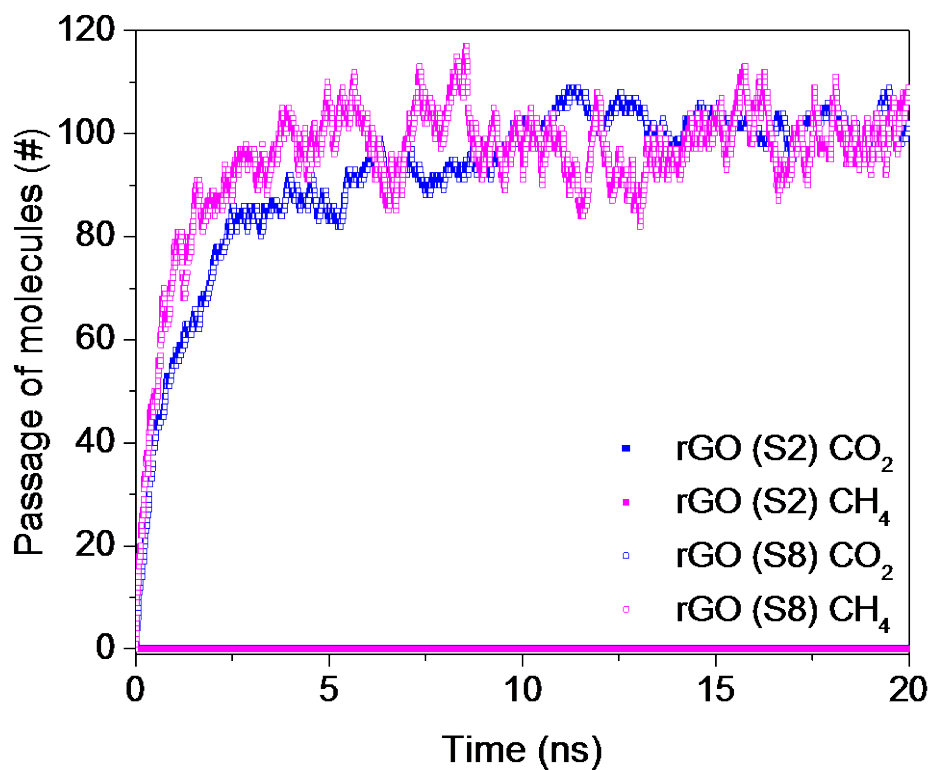

**Supplementary Figure 6 rGO membranes for CO<sub>2</sub>/CH<sub>4</sub> separation.** This figure shows the passage of CO<sub>2</sub> and CH<sub>4</sub> molecules through rGO membranes (i.e., denoted as S2 and S8 that are listed in Supplementary Table 2 under the following condition) obtained from reducing GO with an initial oxygen concentration of 25% and epoxy: hydroxyl ratio of 1:2 at 3000K as a function of time from a single MD simulation. CO<sub>2</sub> and CH<sub>4</sub> are represented as blue and magenta squares, respectively.

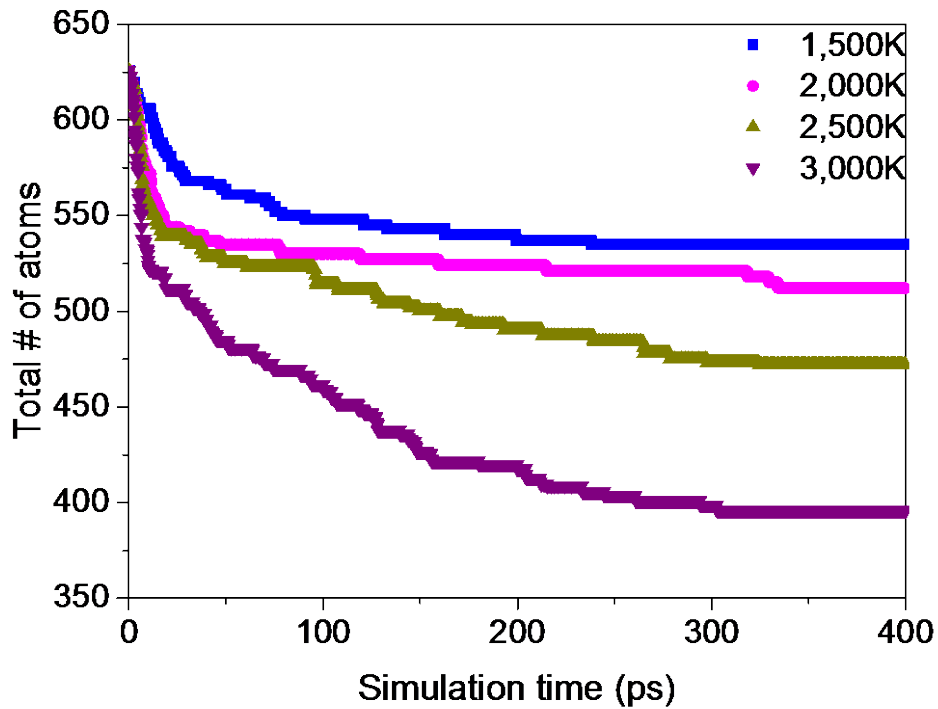

**Supplementary Figure 7 Simulation time for the formation of rGO.** A total simulation time of 400 ps was found to be sufficiently long for reduction processes at temperatures ranging from 1500K to 3000 K. As can be seen from the figure, the total number of atoms in rGO materials remains constant after roughly 300 ps. In these simulations, the initial oxygen concentration and epoxy: hydroxyl ratio of GO materials were chosen to be 25% and 1:1, respectively.

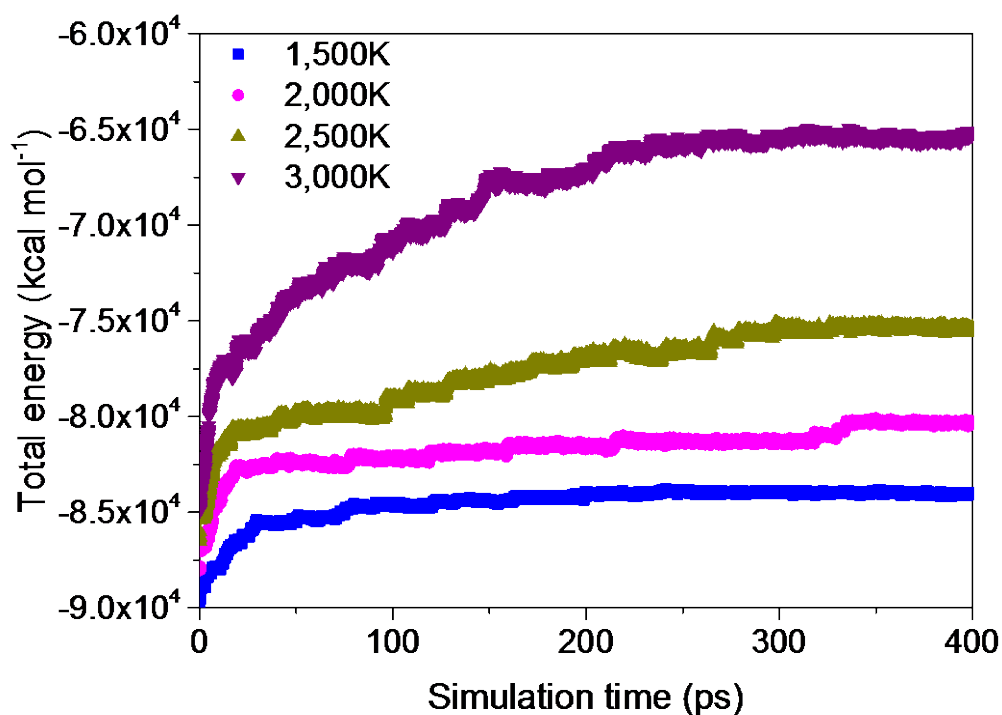

**Supplementary Figure 8 Simulation time for the formation of rGO.** A total simulation time of 400 ps was found to be sufficiently long for reduction processes at temperatures ranging from 1500K to 3000 K. As shown in the figure, the total energy of simulated systems reaches equilibrium after roughly about 300 ps. In these simulations, the initial oxygen concentration and epoxy: hydroxyl ratio of GO materials were chosen to be 25% and 1:1, respectively.



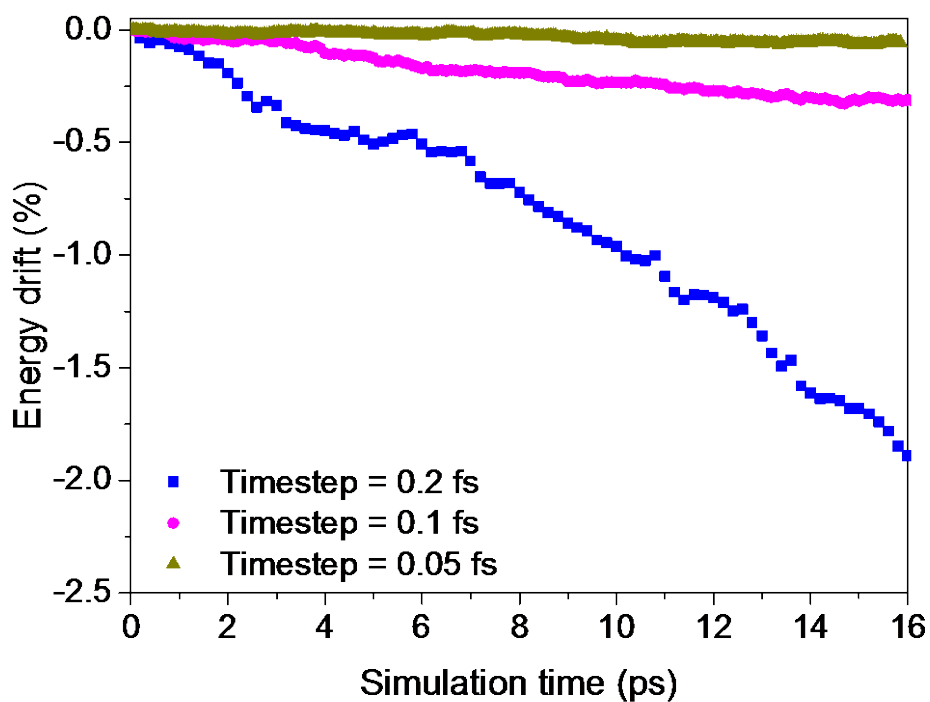

**Supplementary Figure 9 Simulation time step used for the formation of rGO at 2500K.** A time step of 0.05 fs is needed at the reduction temperature of 2500K in order to maintain energy conservation in a NVE ensemble. In these simulations, the initial oxygen concentration and epoxy: hydroxyl ratio of GO materials were chosen to be 25% and 1:1, respectively.

**Supplementary Table 1 Largest free sphere radius.** The largest free sphere radius of each rGO formed from reducing GO with an initial oxygen concentration of 17% is listed. The largest sphere radius of a given membrane was calculated based on its projected atomic coordinates on the X-Y plane and the regions inside the van der Waals surface of each atom were not excluded. Considering rGO membranes are not perfectly planar, the determined radius of the largest pore of an rGO may be underestimated.

| Sample          | Epoxy: hydroxyl= 1:2 | Epoxy: hydroxyl= 1:1 | Epoxy: hydroxyl= 2:1 |
|-----------------|----------------------|----------------------|----------------------|
| <b>T=1,500K</b> |                      |                      |                      |
| S1              | 1.4119               | 1.5538               | 1.4295               |
| S2              | 1.4546               | 1.4184               | 1.5789               |
| S3              | 1.4446               | 1.4532               | 1.5115               |
| S4              | 1.6382               | 1.4960               | 1.4280               |
| S5              | 1.4564               | 1.4369               | 1.4433               |
| S6              | 1.4661               | 1.4401               | 1.4861               |
| S7              | 1.4263               | 1.4170               | 1.5346               |
| S8              | 1.4972               | 1.4472               | 1.4545               |
| S9              | 1.4204               | 1.4293               | 1.5137               |
| S10             | 1.4321               | 1.5007               | 1.6889               |
| <b>T=2,000K</b> |                      |                      |                      |
| S1              | 1.4470               | 1.5934               | 1.4840               |
| S2              | 1.4698               | 1.4766               | 1.4846               |
| S3              | 1.4353               | 1.4085               | 1.4808               |
| S4              | 1.4391               | 1.5064               | 1.4516               |
| S5              | 1.4375               | 1.4375               | 1.4934               |
| S6              | 1.4320               | 1.4366               | 1.5428               |
| S7              | 1.4699               | 1.4607               | 1.4817               |
| S8              | 1.4678               | 1.4154               | 1.6721               |
| S9              | 1.4226               | 1.5360               | 1.5766               |
| S10             | 1.4342               | 1.4741               | 1.5439               |
| <b>T=2,500K</b> |                      |                      |                      |
| S1              | 1.4159               | 1.5060               | 1.7106               |
| S2              | 1.4397               | 1.4913               | 1.4566               |
| S3              | 1.4596               | 1.7381               | 1.4645               |
| S4              | 1.4143               | 1.4259               | 1.4496               |
| S5              | 1.4410               | 1.4089               | 1.5469               |
| S6              | 1.4383               | 1.4795               | 1.4831               |
| S7              | 1.4366               | 1.4291               | 1.7923               |
| S8              | 1.6497               | 1.5389               | 1.4950               |
| S9              | 1.4922               | 1.5128               | 1.5323               |
| S10             | 1.4203               | 1.4177               | 1.4287               |
| <b>T=3,000K</b> |                      |                      |                      |
| S1              | 1.4082               | 1.7728               | 2.6121               |
| S2              | 1.4547               | 1.4896               | 1.4369               |
| S3              | 1.4150               | 1.7596               | 1.5199               |
| S4              | 1.4050               | 1.4851               | 1.4155               |
| S5              | 1.4746               | 1.4728               | 1.6556               |
| S6              | 1.4357               | 1.4032               | 1.5477               |
| S7              | 1.7354               | 1.6117               | 1.4183               |
| S8              | 1.5656               | 1.5317               | 1.6354               |
| S9              | 1.5326               | 1.4219               | 1.7120               |
| S10             | 1.8617               | 1.8080               | 1.5644               |

**Supplementary Table 2 Largest free sphere radius.** The largest free sphere radius of each rGO formed from reducing GO with an initial oxygen concentration of 25% is listed. The largest sphere radius of a given membrane was calculated based on its projected atomic coordinates on the X-Y plane and the regions inside the van der Waals surface of each atom were not excluded. Considering rGO membranes are not perfectly planar, the determined radius of the largest pore of an rGO may be underestimated.

| Sample          | Epoxy: hydroxyl= 1:2 | Epoxy: hydroxyl= 1:1 | Epoxy: hydroxyl= 2:1 |
|-----------------|----------------------|----------------------|----------------------|
| <b>T=1,500K</b> |                      |                      |                      |
| S1              | 1.5233               | 1.5753               | 1.6275               |
| S2              | 1.4774               | 1.6169               | 2.0577               |
| S3              | 1.6098               | 1.6023               | 1.5537               |
| S4              | 1.6639               | 1.6489               | 1.6936               |
| S5              | 1.4428               | 1.6141               | 1.7385               |
| S6              | 1.4451               | 1.4700               | 1.6018               |
| S7              | 1.4549               | 1.4813               | 1.6714               |
| S8              | 1.4265               | 1.6005               | 1.7330               |
| S9              | 1.4837               | 1.6016               | 1.5428               |
| S10             | 1.4275               | 1.7063               | 2.0277               |
| <b>T=2,000K</b> |                      |                      |                      |
| S1              | 1.8896               | 1.6518               | 1.7707               |
| S2              | 1.5141               | 2.6063               | 1.8199               |
| S3              | 1.5599               | 1.9828               | 2.0134               |
| S4              | 1.4894               | 1.7430               | 3.1744               |
| S5              | 1.6458               | 1.5856               | 2.2855               |
| S6              | 1.4747               | 1.8179               | 2.0761               |
| S7              | 1.4385               | 1.8621               | 1.9125               |
| S8              | 1.5571               | 1.5738               | 1.8821               |
| S9              | 1.7763               | 1.5413               | 2.2563               |
| S10             | 1.5668               | 1.6278               | 2.2293               |
| <b>T=2,500K</b> |                      |                      |                      |
| S1              | 1.5354               | 2.0669               | 4.8118               |
| S2              | 1.5958               | 1.9411               | 2.9551               |
| S3              | 1.7613               | 2.2182               | 2.9876               |
| S4              | 1.4263               | 1.7398               | 2.1793               |
| S5              | 1.5762               | 2.2767               | 2.0714               |
| S6              | 1.5358               | 1.5430               | 3.2844               |
| S7              | 1.5186               | 1.9509               | 2.3303               |
| S8              | 1.4474               | 2.2805               | 2.0446               |
| S9              | 1.9419               | 2.0064               | 2.3293               |
| S10             | 1.5938               | 2.1279               | 2.3100               |
| <b>T=3,000K</b> |                      |                      |                      |
| S1              | 1.5041               | 2.5900               | 4.8760               |
| S2              | 1.8932               | 2.1003               | 2.8281               |
| S3              | 2.2875               | 3.3729               | 6.1525               |
| S4              | 1.7777               | 3.1277               | 4.9301               |
| S5              | 2.6894               | 2.6546               | 6.6958               |
| S6              | 1.8895               | 2.6849               | 3.4886               |
| S7              | 1.9814               | 2.0003               | 5.6319               |
| S8              | 2.9643               | 4.5129               | 4.0726               |
| S9              | 1.9789               | 2.0034               | 8.3770               |
| S10             | 1.5016               | 2.8757               | 8.0664               |

**Supplementary Table 3 Separation performance of rGO membranes in natural gas purification.** Comparison of the CO<sub>2</sub>/CH<sub>4</sub> separation performance between the chosen rGO membrane (see Supplementary Fig. 5) and several different materials reported in the literature. The gas permeance of the rGO membrane was obtained by fitting to the MD result using the process model described in Methods section (i.e., gas permeance is the fitted parameter).

| Materials                     | CO <sub>2</sub> permeance<br>(mol m <sup>-2</sup> s <sup>-1</sup> Pa <sup>-1</sup> ) | CO <sub>2</sub> /CH <sub>4</sub><br>selectivity |
|-------------------------------|--------------------------------------------------------------------------------------|-------------------------------------------------|
| rGO (this work, sim.)         | 2.1x10 <sup>-4</sup>                                                                 | INF                                             |
| Bio-MOF-1 (exp.) <sup>1</sup> | <1.2x10 <sup>-6</sup>                                                                | < 2.6                                           |
| ZIF-8 (exp.) <sup>2</sup>     | <2.4x10 <sup>-5</sup>                                                                | <7.0                                            |
| DDR (exp.) <sup>3</sup>       | 7x10 <sup>-8</sup>                                                                   | 280                                             |
| MFI (exp.) <sup>4</sup>       | <7x10 <sup>-6</sup>                                                                  | ~ 4                                             |
| SAPO-34 (exp.) <sup>5</sup>   | <2.0x10 <sup>-6</sup>                                                                | <171                                            |

## References

- <sup>1</sup> Bohrman, J.A. & Carreon, M.A., Synthesis and CO<sub>2</sub>/CH<sub>4</sub> separation performance of Bio-MOF-1 membranes. *Chem. Commun.* **48**, 5130–5132 (2012).
- <sup>2</sup> Venna, S. & Carreon, M. Highly permeable zeolite imidazolate framework-8 membranes for CO<sub>2</sub>/CH<sub>4</sub> separation. *J. Am. Chem. Soc.* **132**, 76–78 (2010).
- <sup>3</sup> Tomita, T., Nakayama, K. & Sakai, H. Gas separation characteristics of DDR type zeolite membrane. *Microporous Mesoporous Mater.* **68**, 71–75 (2004).
- <sup>4</sup> Sandström, L., Sjöberg, E. & Hedlund, J. Very high flux MFI membrane for CO<sub>2</sub> separation. *J. Membr. Sci.* **380**, 232–240 (2011).
- <sup>5</sup> Carreon, M.A., Li, S. & Falconer, J.L. Alumina-supported SAPO-34 membranes for CO<sub>2</sub>/CH<sub>4</sub> separation. *J. Am. Chem. Soc.* **130**, 5412–5413 (2008).
